# Supplementary material for: Wet collections accession: a workflow based on a large stonefly (Insecta, Plecoptera) donation
Source: Biodivers Data J. 2018 Dec 7;(6):e30256. doi: 10.3897/BDJ.6.e30256 (PMC6294822; doi:10.3897/BDJ.6.e30256)
Supplement: Supplementary material 1 — B.P. Stark 1971/1972 Digitized Field Notebook for Plecoptera Collected in Oklahoma. [file bdj-06-e30256-s001.xlsx]

## Sheet: Field Notebook
RecordID	Stark Locations	FieldNo.	TripNumID	LocationNo.	Date (M/D/YYYY)	Mileage	VerbatimAccount
1							Trip numbers are generally organized by a consecutive visit number, 1-17, and consecutive numbers within a visit. Sometimes this broke down early in the process so that locations sampled that yielded no stoneflies were given neither a visit, nor an event number. Sometimes collections that were clearly not part of OKLAHOMA work were also not given standard trip numbers. Later effort generally gave…
2							Field Journal - Plecoptera Collections. Bill P. Stark, 918 E 4th St., Irving, Texas 75060.
3							Irving, Texas, Jan. 13, 1971 Beginning mileage 58,679. Ending mileage 59,388. Total (709).
4	BPStark-33	BPStark-1971-1-1	1-1	33	1971-02-13	58846	#1 58846. Hgy 70 5 mi. E. Hugo, Okla. unnamed Roadside stream. One adult Allocapnia? Several naiads. Choctaw Co.
5	BPStark-29	BPStark-1971-1-2	1-2	29	1971-02-13	58862	#2 58862 Hgy 70 6 mi E Ft. Towson, Okla. Clear Creek. Naiads of 2 apparent species, Taeniopteryx and ___? Sandy substrate. Choctaw Co.
6	BPStark-30	BPStark-1971-1-3	1-3	30	1971-02-13	58874	#3 58874 Hgy 98 4 mi. N Valiant, Okla. Cypress Creek. Naiades of Isogenus? Allocapnia? Taeniopteryx 2 adult Allocapnia? Muddy substrate some rocks. Choctaw Co.
7	BPStark-115	BPStark-1971-1-4	1-4	115	1971-02-13	58875	#4 58875 Hgy 98 e mi N Valiant, OK. Rock Creek (fast flow, very rocky substrate). 2 naiads. McCurtain Co.
8	BPStark-111	BPStark-1971-1-5	1-5	111	1971-02-13	58884	#5 58884 Hgy 3 12 mi W Broken Bow, OK. Horse head creek (W Rock Creek). 3 naiads. McCurtain Co.
9	BPStark-109	BPStark-1971-1-6	1-6	109	1971-02-13	58888	#6 58888 Hgy 3 10 W. Broken Bow, Ok. Unnamed stream-Glover River Drainage. 2 species adults & naiads.
10							2-13-71. All streams sampled had high flow rates - apparently it had rained recently. The naiads at every location were principally found in leaves piled up around rock of [and] tree limbs. The major Rivers (Kiamichi, Little, Blue, Glover, Mt. Fork & Poteau) were all too deep to sample. The Kiamichi was sampled near its headwaters in LeFlore Co.
11	BPStark-112	BPStark-1971-1-7	1-7	112	1971-02-13	58896	#7 58896 Hgy 3 2 mi W Broken Bow, Okla. Lakfata Creek. 4 naiads. McCurtain Co.
12	BPStark-106	BPStark-1971-1-8	1-8	106	1971-02-13	58903	#8 58903 Hgy 70 2 mi E Broken Bow, Coon Creek. 3 species of naiads. McCurtain Co.
13	BPStark-117	BPStark-1971-1-9	1-9	117	1971-02-13	58908	#9 58908 Hgy 259 2 mi. N Broken Bow. Yanubbee Creek. 1 naiad. McCurtain Co.
14	BPStark-116	BPStark-1971-1-10	1-10	116	1971-02-13	58944	#10 58944 Hgy 4 1 mi. W. Smithville. unnamed stream. 2 naiads. McCurtain Co.
15	BPStark-77	BPStark-1971-1-11	1-11	77	1971-02-13	58952	#11 58952 Hwy 259 8 mi N Smithville. LeFlore Co. Cucumber Creek. 1 naiad.
16	BPStark-78	BPStark-1971-1-12	1-12	78	1971-02-13	58962	#12 58962 Hgy 259 18 mi N Smithville. Kiamichi River. 4 naiads. LeFlore Co.
17	BPStark-86	BPStark-1971-1-13	1-13	86	1971-02-13	58966	#13 58966 Hgy 259 22 mi N Smithville. Unnamed stream. 4 naiads. LeFlore Co.
18							Spent the night in Red Oak.
19							2-14-71. The streams sampled in western Latimer Co., Haskell & Pittsburgh Co. were considerably lower there than in McCurtain & LeFlore Cos. Pushmataha Co. streams were like those in McCurtain & LeFlore.
20	BPStark-71	BPStark-1971-1-14	1-14	71	1971-02-14	59039	#14 59039 1 mi E Panola. Little Fourche Maline Creek. 6:30 am. 2 species naiads. Latimer Co.
21	BPStark-70	BPStark-1971-1-15	1-15	70	1971-02-14	59053	#15 59053 - Off Hgy 2 Robbers Cave State Park. Fourche Maline Crk. 7 mi N Wilburton Several naiads & adults Allocapnia. Pair copulating under a rock. Latimer Co.
22	BPStark-50	BPStark-1971-1-16	1-16	50	1971-02-14	59078	#16 59078 Hwy 2 6 mi N Kinta. Unnamed stream. Several naiads. Haskell Co.
23	BPStark-133	BPStark-1971-1-17	1-17	133	1971-02-14	59136	#17 59136 Hgy 270 1 mi. W Haileyville. Brush Creek. Isogenus, Taeniopteryx, Strophopteryx. Pittsburgh Co.
24	BPStark-75	BPStark-1971-1-18	1-18	75	1971-02-14	59153	#18 59153 Hgy 1 13 mi E Hartshorne. Pine Creek. Latimer Co. Okl. Naiads.
25	BPStark-147	BPStark-1971-1-19	1-19	147	1971-02-14	59177	#19 59177 Hgy 271 2 mi S Clayton. Hurd Creek. Naiads. Pushmataha Co.
26	BPStark-146	BPStark-1971-1-20	1-20	146	1971-02-14	59182	#20 59182 Hgy 271 7 mi S Clayton. Hardy Creek. Zealeuctra adult & a few perlodid naiads. Pushmataha Co.
27	BPStark-144	BPStark-1971-1-21	1-21	144	1971-02-14	59185	#21 59185 Hgy 271 1 mi S Nashoba. Buzzard Creek. A few naiads. Pushmataha Co.
28	BPStark-149	BPStark-1971-1-22	1-22	149	1971-02-14	59193	#22 59193 Hgy 271 9 mi S Nashoba. Snow Creek. A few naiads. Pushmataha Co.
29	BPStark-148	BPStark-1971-1-23	1-23	148	1971-02-14	59206	#23 59206 Hgy 271 5 mi S Finley. Little Cedar Creek. "Zealeactra" naiads & "isogenous".
30	BPStark-28	BPStark-1971-1-24	1-24	28	1971-02-14	59241	#24 59241 Hgy 70 10 mi W Hugo. Bokchito Creek. One small naiad. Abundant algae & snails. Possibly polluted? Choctaw Co.
31	BPStark-20	BPStark-1971-1-25	1-25	20	1971-02-14	59261	#25 59261 Hgy 70 8 mi W Boswell. Several small naiads. Bryan Co.
32	BPStark-18	BPStark-1971-1-26	1-26	18	1971-02-14	59265	#26 59265 Hgy 70 12 mi Boswell. Sulphur Creek. Few small naiads.
33	BPStark-99	BPStark-1971-2-A	2-A	99	1971-02-27	60238	2A 60238 Small unnamed stream, 4 mi N Madill Hgy 70. Sandy substrate. No stoneflies.
34	BPStark-65	BPStark-1971-2-B	2-B	65	1971-02-27		2B 60247 Sm. unnamed stream. 3 mi W Mannsville Hgy 70. Limestone & sand substrate. No stoneflies.
35	BPStark-61	BPStark-1971-2-1	2-1	61	1971-02-27	60266	2-1 60266 Pennington Creek. Tishomingo, Okla. Hgy 22. Isogenus - adult in dry leaves, Taeniopteryx, Isoperla, Perlesta.
36	BPStark-58	BPStark-1971-2-2	2-2	58	1971-02-27	60268	2-3 60268 Unnamed stream. H78 2 mi E Tishomingo. Sandy stubtrate. Isogenus et. al naiads i leaves.
37	BPStark-59	BPStark-1971-2-3	2-3	59	1971-02-27	60275	2-3 60275 Blue Riv. H-48A 1/2 mi. N Milburn. Sandy substrate. Isogenus, Taeniopteryx etc. naiads in leaves.
38	BPStark-62	BPStark-1971-2-4	2-4	62	1971-02-27	60281	2-4 60281 Unnamed creek H-48A 1/2 mil E Fillmore. Sandy substrate.
39	BPStark-63	BPStark-1971-2-5	2-5	63	1971-02-27	60289	2-5 60289 Sandy Creek. Hgy 48. 3 mi. S Wapanucka. Granite rocks & sand. Isogenus naiads, Isoperla, Perlesta.
40	BPStark-36	BPStark-1971-2-6	2-6	36	1971-02-27	60297	2-6 60297 Unnamed creek. Hwy 48 5 mi N Wapanucka. Zealeactra. Gravely substrate.
41	BPStark-140	BPStark-1971-2-7	2-7	140	1971-02-27	60323	2-7 60323 Muddy Boggy Creek. Hgy 48 8 mi. N. Lula. Zealeuctra. Sandy substrate. Isoperla. Pontotoc.
42	BPStark-136	BPStark-1971-2-8	2-8	136	1971-02-27	60362	2-8 60362 Blue River. Hgy 1 15 mi. SW Ada. Rocky substrate. Pontotoc.
43	BPStark-120	BPStark-1971-2-9	2-9	120	1971-02-27	60379	2-9 60379 Rock Creek. Platt Natl. Park Sulphur, OK. Rocky. Isogenus, Perlesta.
44	BPStark-45	BPStark-1971-2-9A	2-9A	45	1971-02-27	60396	2-9A 60396 Unnamed stream. Hgy 29 9 mi E Wynnewood. No stoneflies.
45					1971-02-28		2-28-71
46	BPStark-118	BPStark-1971-2-9B	2-9B	118	1971-02-28	60435	2-9B 60435 Honey Creek. Hgy 77 5 mi S Davis. No stoneflies; looked like an ideal location.
47	BPStark-23	BPStark-1971-2-9C	2-9C	23	1971-02-28	60451	2-9C 60451 Unnamed creek. Hgy 53 6 mi. W Hgy 35 intersection. No stoneflies.
48	BPStark-93	BPStark-1971-2-9D	2-9D	93	1971-02-28	60506	2-9D 60506 Unnamed creek. Hgy 32 10 mi W Marietta. No stoneflies.
49	BPStark-96	BPStark-1971-2-9E	2-9E	96	1971-02-28	60537	2-9E 60537 Briar Creek. Hgy 32 5 mi W Kingston. No stoneflies.
50	BPStark-17	BPStark-1971-2-10	2-10	17	1971-02-28	60569	2-10 60569 Blue River. Hgy 69/75 5 mi N Durant. Isogenus et al.
51							3-27-71
52	BPStark-168	BPStark-1971-3-0	3-0	168	1971-03-27	62386	3-0 62386 37 (Texas) Sulphur River. 3 mi. N Hagansport. No stoneflies.
53	BPStark-107	BPStark-1971-3-1	3-1	107	1971-03-27	62448	3-1 62448 - 98 Okla. 8 mi N Valiant. Cypress Creek. 2 species. Hydroperla adults in leaf drifts - Approx. 6 species of naiads. McCurtain.
54	BPStark-111	BPStark-1971-3-2	3-2	111	1971-03-27	62459	3-2 62459 3-7 Okla. 9 mi NE Wright City, Okla. Horsehead Creek. Hydroperla naiads & 2 adults. Another species naiad.
55	BPStark-106	BPStark-1971-3-3	3-3	106	1971-03-27	62477	3-3 62477 Hgy 70 Okla. 3 mi E Broken Bow. Coon Creek. Hydroperla adults (2) on bridge abutment (couldn't get). Several species naiads.
56	BPStark-108	BPStark-1971-3-4	3-4	108	1971-03-27	62509	3-4 62509 Hgy 37 Okla. 8 mi W Idabel. Garvin Creek. Very abundant last instar naiads & some of another species. No adults seen but 1 exuvium collected.
57							4-8-1971
58	BPStark-17	BPStark-1971-4-1	4-1	17	1971-04-08	63541	4-1 63541 Blue River. 5 mi. N Durant Hgy 75. Several types of naiads.
59	BPStark-12	BPStark-1971-4-2	4-2	12	1971-04-08	63557	4-2 63557 Caney Creek. 8 mi N Caddo Hgy 75. A few small naiads.
60	BPStark-133	BPStark-1971-4-3	4-3	133	1971-04-08	63625	4-3 63625 Brushy Creek. 1 mi W Haileyville Hwy 70. Several Hydroperla adults under rocks. Naiads of Perlidae.
61	BPStark-69	BPStark-1971-4-4	4-4	69	1971-04-08	63648	4-4 63648 Fourche Maline. 4 mi E Wilburton Hgy 270. Perlidae naiads.
62	BPStark-67	BPStark-1971-4-5	4-5	67	1971-04-08	63662	4-5 63662 Brazil Creek. 3 mi. N E Red Oak Farm Road. Hydroperla adults et al.
63	BPStark-76	BPStark-1971-4-6	4-6	76	1971-04-08	63671	4-6 63671 Turkey Creek. 7 mi E Red Oak Hgy 270. Isoperla & Hydroperla adults. Collembola collected also.
64	BPStark-84	BPStark-1971-4-7	4-7	84	1971-04-08	63680	4-7 63680 Red Oak Creek. 5 mi SE Red Oak farm road. Several naiads.
65	BPStark-68	BPStark-1971-4-8	4-8	68	1971-04-09		4-8 Caston Creek. 5 mi E Fanshawe Hgy 270. Several naiads; Perlesta, Isoperla.
66	BPStark-73	BPStark-1971-4-10	4-10	73	1971-04-09	63703	4-10 63703 Mountain Creek. 1 mi W Wiste Hgy 270. Hydroperla, Isoperla, Perlesta. Numerous H & I exuviae.
67	BPStark-7	BPStark-1971-4-11	4-11	7	1971-04-09	63788	4-11 63788 Barron Fork Creek. 8 mi N Stillwell Hgy 59. No stonefly naiads. Downstream from a dredging operation.
68	BPStark-9	BPStark-1971-4-12	4-12	9	1971-04-09	63788.1	4-12 63788.1 Shell Branch. 8 mi N Stillwell Hgy 59. Numerous Isoperla & Amphinemura. Adult I. under small stones. Groups of 5-10 under a single small stone. Adair Co.
69	BPStark-5	BPStark-1971-4-13	4-13	5	1971-04-09	63800	4-13 63800 Ballard Creek. 7 mi N Westville Hgy 59. Numerous Isoperla adults. Pictures made. Adair Co.
70	BPStark-43	BPStark-1971-4-14	4-14	43	1971-04-09	63816	4-14 63816 Flint Creek. Flint, OK, Hgy 59. Acroneuria et al. 1 F Isoperla; 1 F Hydroperla reared. Delaware Co.
71	BPStark-130	BPStark-1971-4-15	4-15	130	1971-04-09	63865	4-15 63865 Horse Creek. 10 mi W Grove Hgy 59. No stoneflies; heavy algae growth.
72	BPStark-41	BPStark-1971-4-16	4-16	41	1971-04-09	63900	4-16 63900 Lightening Creek. 15 mi W Vinita Hgy 60. Hydroperla, Isoperla naiads a few. Heavy algae growth. Craig Co.
73	BPStark-126	BPStark-1971-4-17	4-17	126	1971-04-09	63926	4-17 63926 Hog Shooter Creek. 11 mi W Nowata Hgy 60. Isoperla naiads, Perlesta, Hydroperla exuvium. Nowata Co.
74	BPStark-129	BPStark-1971-4-18	4-18	129	1971-04-09	63969	4-18 63969 Birch Creek. 6 mi. S Pawhuska Hgy 99. Isoperla naiads, Perlesta Hydroperla exuvium. Osage Co.
75	BPStark-128	BPStark-1971-4-18A	4-18A	128	1971-04-09	63978	4-18A 63978 Big Hominy Creek. 6 mi S Wynona Hwy 99. No stoneflies. Abundant blackfly larvae.
76	BPStark-42	BPStark-1971-4-18B	4-18B	42	1971-04-09		4-18B Lagoon Creek. 4 mi South Jennings Hwy 99. Dry. Creek Co.
77	BPStark-90	BPStark-1971-4-18C	4-18C	90	1971-04-09		4-18C 64114 Deep Fork Canadian River. Didn't sample, stream was not running, stagnat water, 4 mi South of Stroud, Hwy 99.
78	BPStark-142	BPStark-1971-4-18D	4-18D	142	1971-04-09		4-18D 64136 No. Canadian River. Didn't sample, no riffles, 6 mi South Prague.Hpy 99 6 mi S Prague Hwy 99
79	BPStark-153	BPStark-1971-4-18E	4-18E	153	1971-04-09		4-18E 64157 Little River. 3 mi S Bowlegs Hwy 99. No stoneflies, lots of blackflies, sandy substrate.
80	BPStark-57	BPStark-1971-4-18F	4-18F	57	1971-04-09		4-18F 64195 So. Canadian River. Didn't sample. 1 mi N Calvin Hwy 99.
81							Spent the night in Dumright.
82							4-10/71
83	BPStark-132	BPStark-1971-4-18G	4-18G	132	1971-04-10		4-18G 64055 Cimarron River. 1 mi South Perkins Hwy 177. Sterile fine sand substrate. Payne Co.
84	BPStark-92	BPStark-1971-4-18H	4-18H	92	1971-04-10		4-18H 64097 Unnamed creek. 6 mi S Dumright Hwy 99. No stoneflies; chironomids, black flies, a few dyticscids seen. Oil film on surface.
85	BPStark-91	BPStark-1971-4-18I	4-18I	91	1971-04-10	64123	4-18I 64123 Deer Creek. Hly 99 12 mi S Stroud. No stoneflies, sandy substrate, large black fly pop..
86	BPStark-154	BPStark-1971-4-18J	4-18J	154	1971-04-10		4-18J 64139 Turkey Creek. 9 mi South Prague Hwy 99. Practically sterile, sandy substrate. Seminole Co.
87	BPStark-152	BPStark-1971-4-18K	4-18K	152	1971-04-10		4-18K 64174 Jacobs Creek. 3 mi east Wewoka Hwy 270. No stoneflies, rocky sandstone substrate, black flies present, apparent oil field pollution. Seminole Co.
88	BPStark-56	BPStark-1971-4-19	4-19	56	1971-04-10	64198	4-19 64198 Salt Creek. 2 mi E Calvin Hwy 270. A few stonefly naiads, sandy substrate. Hughes Co.
89	BPStark-54	BPStark-1971-4-20	4-20	54	1971-04-10	64205	4-20 64205 Coal Creek. West Stuart Hwy 270. Several naiads. 1 adult Hydroperla & 1 Isoperla. Rocky substrate. Hughes Co.
90	BPStark-75	BPStark-1971-4-21	4-21	75	1971-04-10	64255	4-21 64255 Pine Creek. 13 mi East Hartshorne Hwy 1. Abundant stoneflies (naiads in bucket). Rocky substrate. Latimer Co.
91	BPStark-72	BPStark-1971-4-22	4-22	72	1971-04-10	64286	4-22 64286 Unnamed Creek. 2 mi North Bengal (Co. Rd.). Stonefly naiads. Rocky substrate. Latimer Co.
92	BPStark-84	BPStark-1971-4-23	4-23	84	1971-04-10	64300	4-23 64300 Red Oak Creek. Red Oak. 3 Isogenus adults in leaf debris.
93	BPStark-135	BPStark-1971-4-24	4-24	135	1971-04-11	64363	4-24 64363 unnamed stream. 15 mi S MacAlester Indian Nat. Turn. A few Isoperla exuviae. Stream almost dry. Pittsburg Co.
94	BPStark-150	BPStark-1971-4-25	4-25	150	1971-04-11	64397	4-25 64397 Unnamed stream. 4 mi N Antlers I.N.T. Isoperla & Perlesta. Pushmataha Co.
95							May 1, 1971
96	BPStark-107	BPStark-1971-5-1	5-1	107	1971-05-01	65983	5-1 65983 Cypress Creek. 7 mi N Valiant Hgy 98. Perlesta emergence, additional small adults, a few naiads in bucket #1.
97	BPStark-111	BPStark-1971-5-2	5-2	111	1971-05-01	65993	5-2 65993 Horsehead Creek. 9 mi NE Wright City Hgy 3-7. Naiads in green top bucket.
98	BPStark-106	BPStark-1971-5-3	5-3	106	1971-05-01	66010	5-3 66010 Coon Creek. 2 mi E Broken Bow. Naiads in small bucket - met Dr. Schaeffer (P.A. & M.) Collecting vertebrates here.
99							2 May 71
100							A single Amphinemura female was observed completely submerged under water walking around on the side of the container.
101							5 May 71
102							2 additional females were observed submerged in the container.
103	BPStark-120	BPStark-1971-6-1	6-1	120	1971-06-21	69028	6-1 69028 Rock Creek. Platte Natl. Park., Sulphur, Okla. One stonefly naiad.
104							June 26, 1971
105							Okla. City. Stark-Poole. E.M. 69535. B.M. 69141. Tot. 394.
106	BPStark-43	BPStark-1971-7-1	7-1	43	1971-06-26	69319	7-1 69319 Flint Creek. Flint, Okla. Numerous naiads & exuviae. Hgy 59-33. Exuviae on rocks at edge of H2O - "chat" substrate. Delaware Co.
107	BPStark-6	BPStark-1971-7-2	7-2	6	1971-06-26	69334	7-2 69334 Ballard Creek. Watts, Okla. Naiads & exuviae. Hgy 59. Rocky substrate.
108	BPStark-8	BPStark-1971-7-3	7-3	8	1971-06-26	69349	7-3 69349 Unnamed stream. 8 mi. west Westville, OK Hgy 62. Naiads & exuviae. "Chat" substrate. Adair.
109	BPStark-27	BPStark-1971-7-4	7-4	27	1971-06-26	69380	7-4 69380 Unnamed stream. Hulbert, Okla. Hgy 51. Naiads & exuviae. Cherokee.
110							Sept. 5, 1971
111	BPStark-84	BPStark-1971-7-4A	7-4A	84	1971-09-05	.	7-4A Red Oak Creek Latimer Co. Okla. No stoneflies present.
112							Oct. 24, 1971
113	BPStark-84	BPStark-1971-7-4B	7-4B	84	1971-10-24	.	7-4B Red Oak Creek. Latimer Co., Okla. No stoneflies present.
114	BPStark-103	BPStark-1971-7-4C	7-4C	103	1971-10-24	.	7-4C Buzzard Creek. McCurtain Co., Okla. No stoneflies present.
115							Oct. 30, 1971
116	BPStark-17	BPStark-1971-7-4D	7-4D	17	1971-10-30	.	7-4D Blue River. Bryan Co., Okla. No stoneflies present.
117							Nov. 13, 1971
118	BPStark-59	BPStark-1971-7-4E	7-4E	59	1971-11-13	.	7-4E Blue River. Johnston Co., Okla. No stoneflies present.
119							Nov. 27, 1971
120							Los Angelos Trip. Beg. Miles 6387, E.M. 9620
121	BPStark-170	BPStark-1971-7-4F	7-4F	170	1971-11-27	.	7-4F (1) Palo Duro Canyon. Stoneflies.
122	BPStark-3	BPStark-1971-7-4G	7-4G	3	1971-11-27	.	7-4G (2) Pecos Riv. Santa Rosa, N.M. Stoneflies collected.
123	BPStark-4	BPStark-1971-7-4H	7-4H	4	1971-11-27	.	7-4H (3) Zuni[?] Creek, McKinley Co. N.M.
124	BPStark-1	BPStark-1971-7-4I	7-4I	1	1971-11-27	.	7-4I (4) Oak Creek Canyon- near Sedona, Arizona, Todd's Lodge
125							Itemized expenses.
126							Dec. 2, 1971
127	BPStark-2	BPStark-1971-7-4J	7-4J	2	1971-12-02	.	Sabino Campground, Tuscon, Ariz. Collected stoneflies, 12-2-71.
128							Dec. 4, 1971
129	BPStark-167	BPStark-1971-7-4K	7-4K	167	1971-12-04	.	Duck Creek & Clear Creek. Denton Co., Texas near Bolivar. Collected 1 Allocapnia naiad at each location and Hydroperla naiads.
130							Tues. Dec. 21, 1971 (8th trip)
131							B.M Irving--10989. E.M 11773. [total] 784.
132	BPStark-32	BPStark-1971-8-1	8-1	32	1971-12-21	11146	8-1 11146 Unnamed - 70 - 4 mi E Hugo. Allocapnia adults & naiads. Limestone gravel substrate.
133	BPStark-29	BPStark-1971-8-2	8-2	29	1971-12-21	11163	8-2 11163 Clear Creek - 70- 7 mi E Ft. Towson. Taeniopteryx naiads. Fine sand substrate.
134	BPStark-30	BPStark-1971-8-3	8-3	30	1971-12-21	11174	8-3 11174 Cypress Creek -98- 7 mi N Valliant. Gravel substrate, sandstone. Allocapnia, Taeniopteryx, Zealeuctra, Hydroperla.
135	BPStark-111	BPStark-1971-8-4	8-4	111	1971-12-21	11184	8-4 11184 Horsehead Creek -3-7 15 mi W Broken Bow. Naiads.
136	BPStark-110	BPStark-1971-8-5	8-5	110	1971-12-21	11188	8-5 11188 Glover Riv. - 3-7 11 mi W Broken Bow. Adult Taeniopteryx & Allocapnia + naiads. Coarse gravel substrate. Fish.
137	BPStark-105	BPStark-1971-8-6	8-6	105	1971-12-21	11201	8-6 11201 Coon Creek - 70 2 mi E Broken Bow. Naiads.
138	BPStark-114	BPStark-1971-8-7	8-7	114	1971-12-21	11229	8-7 11229 Unnamed stream. 30 mi N Broken. 2 female 1 male Allocapnia. Fish.
139	BPStark-87	BPStark-1971-8-8	8-8	87	1971-12-21	11275	8-8 11275 Unnamed. Hgy 270 - Page, Okla. Naiads.
140	BPStark-85	BPStark-1971-8-9	8-9	85	1971-12-21	11279	8-9 11279 Shawnee Creek. Hgy 59 15 mi S Heavener. Naiads.
141							Spent night in Red Oak.
142							12-22-71
143	BPStark-84	BPStark-1971-8-10	8-10	84	1971-12-22	11335	8-10 11335 Red Oak Creek. Farm Road. Adult & naiad Allocapnia.
144	BPStark-76	BPStark-1971-8-11	8-11	76	1971-12-22	11338	8-11 11338 Turkey Creek - 270 - 7 mi E Red Oak. Zealeuctra, fish.
145	BPStark-68	BPStark-1971-8-12	8-12	68	1971-12-22	11359	8-12 11359 Caston Creek - 270 - 5 mi W Wister. Allocapnia, (fish).
146	BPStark-83	BPStark-1971-8-13	8-13	83	1971-12-22	11374	8-13 11374 Polk Creek -271- 4 mi N Poteau. Allocapnia.
147	BPStark-53	BPStark-1971-8-14	8-14	53	1971-12-22	11410	8-14 11410 Unnamed -9- 9 mi W Keota. Allocapnia.
148	BPStark-51	BPStark-1971-8-15	8-15	51	1971-12-22	11419	8-15 11419 11419 Unnamed. Hwy 9 5 mi W Stigler. Many Allocapnia. Male & female which emerged were attempting to mate. The male probed unsuccessfully on both sides of the female. The female had not yet attained the dark wing condition.
149	BPStark-50	BPStark-1971-8-16	8-16	50	1971-12-22	11423	8-16 11423 Unnamed. Hgy 2 4 mi S Whitefield. Strophopteryx naiads.
150	BPStark-133	BPStark-1971-8-17	8-17	133	1971-12-22	11474	8-17 11474 Brushy. Hgy 270. Haileyville. Taeniopteryx & Allocapnia naiads.
151	BPStark-75	BPStark-1971-8-18	8-18	75	1971-12-22	11490	8-18 11490 Pine Crk. Hwy 1 12 mi W Hartshorne. Many Allocapnia on bridge. 2 mating pairs.
152	BPStark-74	BPStark-1971-8-19	8-19	74	1971-12-23	11528	8-19 11528 Pidgeon Creek. Farm Road, 8 mi W Leflore. Allocapnia.
153	BPStark-89	BPStark-1971-8-20	8-20	89	1971-12-23	11536	8-20 11536 Unnamed. Farm Road. 1 mi S Bengal.
154	BPStark-145	BPStark-1971-8-21	8-21	145	1971-12-23	11549	8-21 11549 Unnamed. Hgy 271 2 mi N Albion. Naiads + Fish.
155	BPStark-151	BPStark-1971-8-22	8-22	151	1971-12-23	11552	8-22 11552 Walnut Creek. Hgy 271 1 mi S Albion. Naiads + Fish.
156	BPStark-146	BPStark-1971-8-23	8-23	146	1971-12-23	11575	8-23 11575 Hardy Creek. Hgy 271 15.5 mi S Clayton. Zealeuctra adults.
157	BPStark-143	BPStark-1971-8-24	8-24	143	1971-12-23	11580	8-24 11580 Big Cedar Crk. Hgy 271 2 mi S Nashoba. Naiads.
158	BPStark-148	BPStark-1971-8-25	8-25	148	1971-12-23	11600	8-25 11600 Little Cedar Crk. Hwy 271 6 mi S Finley. Many Allocapnia adults (5 pr.) mating in leaf piles, also some on bridge. Pushmataha Co.
159	BPStark-13	BPStark-1971-8-26	8-26	13	1971-12-23	11619	8-26 11619 Cold Springs Creek. Hgy 3-7 12 mi W Antlers. Naiads. Atoka Co.
160	BPStark-14	BPStark-1971-8-27	8-27	14	1971-12-23	11628	8-27 11628 Double Spring Creek. Hgy 271 7 mi W Farris. 1 naiad.
161	BPStark-17	BPStark-1971-8-28	8-28	17	1971-12-23	11666	8-28 11666 Blue River. Below dam 5 mi N Durant. Taeniopteryx naiads, fish.
162							12-29-71
163	BPStark-84	BPStark-1971-9-1	9-1	84	1971-12-29	12126	9-1 12126 Red Oak Creek. Farm Road. Allocapnia.
164	BPStark-76	BPStark-1971-9-2	9-2	76	1971-12-29	12166	9-2 12166 Turkey Creek. Hgy 270. Many Allocapnia, 1 Zealeuctra, 1 Taeniopteryx.
165							Thursday 1-6-72
166							B.M. 13020. E.M. 15404. Stop for 71
167	BPStark-17	BPStark-1972-10-1	10-1	17	1972-01-06	13126	10-1 13126 Blue River. Hwy 69 5 mi N Durant. Many Strophopteryx naiads - put in larger bucket. Bryan Co.
168	BPStark-15	BPStark-1972-10-2	10-2	15	1972-01-06	13171	10-2 13171 Limestone Creek. Hgy 69 Limestone Gap, Okla. Many Allocapnia & a few Zealeuctra adults. Atoka Co.
169	BPStark-133	BPStark-1972-10-3	10-3	133	1972-01-06	13209	10-3 13209 Brushy Creek. Hgy 270 Haileyville, Okla. 1 Allocapnia adult & Taeniopteryx naiads of both groups. Pittsburg Co.
170	BPStark-69	BPStark-1972-10-4	10-4	69	1972-01-06	13232	10-4 13232 Fourche Maline. Hgy 270 5 mi E Wilburton. Allocapnia adults & naiads. Latimer Co.
171	BPStark-156	BPStark-1972-10-5	10-5	156	1972-01-07	13305	10-5 13305 Unnamed. 4 mi W Gans Hgy 141. Naiads only Allocapnia. Sequoyah Co.
172	BPStark-158	BPStark-1972-10-6	10-6	158	1972-01-07	13316	10-6 13316 Unnamed. Hgy 64 Sallisaw, Okla. Numerous exuvia on bridge, but only naiads taken here. Sequoyah Co.
173	BPStark-10	BPStark-1972-10-7	10-7	10	1972-01-07	13337	10-7 13337 Unnamed. Hgy 59 21 mi N Sallisaw, Adair Co. Zealeuctra & Allocapnia adults on rocks, bridge & dried leaves. Some very small (Strophopteryx) naiads on rocks.
174	BPStark-9	BPStark-1972-10-8	10-8	9	1972-01-07	13355	10-8 13355 Unnamed Trib. of Baron Fork. Hgy 59 8 mi N Stillwell. Adair Co. Many Allocapnia. Mating pair taken.
175	BPStark-8	BPStark-1972-10-9	10-9	8	1972-01-07	13368	10-9 13368 Unnamed. Hgy 62 8 mi W Westville. Naiads & fish, no winter stoneflies. Adair.
176	BPStark-25	BPStark-1972-10-10	10-10	25	1972-01-07	13399	10-10 13399 14-mile Creek. Hgy 82 9 mi N Talequah, Cherokee Co. Allocapnia, many Strophopteryx naiads, fish.
177	BPStark-101	BPStark-1972-10-11	10-11	101	1972-01-07	13411	10-11 13411 Spring Creek. Hgy 82 6 mi N Peggs (Mayes Co.). Fish, naiads, no winter stoneflies.
178	BPStark-100	BPStark-1972-10-12	10-12	100	1972-01-07	13412	10-12 13412 Snake Creek. Hgy 82 6 mi N Peggs (Mayes Co.). Fish, naiads, no winter stoneflies.
179	BPStark-43	BPStark-1972-10-13	10-13	43	1972-01-07	13441	10-13 13441 Flint Creek. Hgy 33 Flint, Okla. Naiads, fish, no winter stoneflies.. Delaware Co.
180							Spent night in Grove, OK.
181							1-8-72
182	BPStark-131	BPStark-1972-10-14	10-14	131	1972-01-08	13500	10-14 13500 Unnamed. Hgy 60 3 mi E Fairland. No stoneflies. Agricultural pollution.
183	BPStark-39	BPStark-1972-10-15	10-15	39	1972-01-08	13545	10-15 13545 Deer Creek. Hgy 10 3 mi W Welch, OK. 3 Allocapnia naiads + fish. Craig Co.
184	BPStark-40	BPStark-1972-10-16	10-16	40	1972-01-08	13558	10-16 13558 East Big Creek. Hgy 10 15 mi W Welch, OK. Allocapnia adult et al. Craig Co.
185	BPStark-127	BPStark-1972-10-17	10-17	127	1972-01-08	13576	10-17 13576 Unnamed. Hgy 169 3 mi N Lenapah. No stoneflies, small rocky stream. Nowata Co.
186	BPStark-162	BPStark-1972-10-18	10-18	162	1972-01-08	13621	10-18 13621 Unnamed. Hgy 75 5 mi S Copan. No stoneflies, creek rocky substrate. Washington Co.
187	BPStark-129	BPStark-1972-10-19	10-19	129	1972-01-08	13661	10-19 13661 Birch Creek. Hgy 99 6 mi S Pawhuska. Allocapnia adults. (marked 6-18).
188	BPStark-161	BPStark-1972-10-20	10-20	161	1972-01-08	13731	10-20 13831 N. Duck Creek. Hgy 75 19 mi N Okmulgee. No stoneflies - many simuliids.
189							1-9-72
190							Spent night in Red Oak.
191	BPStark-54	BPStark-1972-10-21	10-21	54	1972-01-09	13923	10-21 13923 Coal Creek. Hgy 270 Stuart, Okla. Many Allocapnia, 1 Zealeuctra?
192	BPStark-55	BPStark-1972-10-22	10-22	55	1972-01-09	13937	10-22 13937 Unnamed. Hgy 1 3 mi W Calvin. Many Allocapnia.
193	BPStark-139	BPStark-1972-10-23	10-23	139	1972-01-09	13952	10-23 13952 Muddy Boggy. Hgy 1 6 mi W Allen. 3 naiads.
194	BPStark-141	BPStark-1972-10-24	10-24	141	1972-01-09	13966	10-24 13966 unnamed. Hgy 99 Ada. No stoneflies - fish.
195	BPStark-138	BPStark-1972-10-25	10-25	138	1972-01-09	13970	10-25 13970 Clear Boggy Creek. Hgy 99 2 mi S Ahloso. Hydroperla, fish.. Pontotoc Co.
196	BPStark-137	BPStark-1972-10-26	10-26	137	1972-01-09	13973	10-26 13973 Unnamed. Hgy 99 5 mi S Ahloso. Hydroperla, Perlinella, Allocapnia, fish.. Pontotoc Co.
197	BPStark-60	BPStark-1972-10-27	10-27	60	1972-01-09	14016	10-27 14016 Blue River. Fish & Hunting area. 11 mi NE Tishomingo. Strophopteryx adults in leaf piles.. Johnston Co.
198	BPStark-61	BPStark-1972-10-28	10-28	61	1972-01-09	14028	10-28 14028 Pennington Creek. Hgy 22 Tishomingo. Strophopteryx & Allocapnia. Johnston Co.
199	BPStark-120	BPStark-1972-10-29	10-29	120	1972-01-09	14059	10-29 14059 Rock Creek. Platte Natl. Park, Sulphur, OK. Allocapnia. Murray Co.
200	BPStark-121	BPStark-1972-10-30	10-30	121	1972-01-09	14071	10-30 14071 Unnamed. Hgy 110 6 mi N Dougherty. Zealeuctra. Murray Co.
201							1-10-1972
202	BPStark-119	BPStark-1972-10-31	10-31	119	1972-01-10	14098	10-31 14098 Unnamed. Farm Road 3 mi SE Wynnwood. Sandy Substrate. Allocapnia in leaves. Garvin Co.
203	BPStark-48	BPStark-1972-10-32	10-32	48	1972-01-10	14100	1032 14100 Unnamed. Farm Road 1 mi S Wynnewood. Allocapnia & Hydroperla. Garvin Co.
204	BPStark-47	BPStark-1972-10-33	10-33	47	1972-01-10	14102	10-33 14102 Unnamed. Farm Road Wynnewood. Allocapnia & Hydroperla naiads. Garvin Co.
205	BPStark-46	BPStark-1972-10-34	10-34	46	1972-01-10	14126	10-34 14126 Salt Creek. Hgy 29 8 mi W Elmore City. No stoneflies - many blackflies present. Garvin Co.
206	BPStark-160	BPStark-1972-10-35	10-35	160	1972-01-10	14136	10-35 14136 Unnamed. Hwy 29 17 mi W Elmore City. No stoneflies.
207	BPStark-37	BPStark-1972-10-36	10-36	37	1972-01-10	14192	10-36 14192 Unnamed. Hgy 62 8 mi W Lawton. Many Allocapnia in leaves & under rocks.
208	BPStark-38	BPStark-1972-10-37	10-37	38	1972-01-10	14205	10-37 14205 West Cache Creek. Hgy 62 Cache, Okla. Many Allocapnia. Comanche.
209	BPStark-66	BPStark-1972-10-38	10-38	66	1972-01-10	14234	10-38 14234 Unnamed. Hgy 183 10 mi N Snyder, Okla. No stoneflies.
210	BPStark-163	BPStark-1972-10-39	10-39	163	1972-01-10	14281	10-39 14281 Washita River. Hgy 152 9 mi E Cordell. No stoneflies.
211	BPStark-21	BPStark-1972-10-40	10-40	21	1972-01-10	14298	10-40 14298 Unnamed. Hgy 152 25 mi E Cordell. No stoneflies. Caddo Co.
212	BPStark-22	BPStark-1972-10-41	10-41	22	1972-01-10	14327	10-41 14327 Red Rock Canyon State Park, Hinton. Spring fed stream. No stoneflies.
213	BPStark-16	BPStark-1972-10-42	10-42	16	1972-01-10	14367	10-42 14367 Roman Nose State Park, 7 mi N Watonga.Spring fed stream. No stoneflies.
214							1-11-1972
215							Spent night in Roman Nose State Park near Watonga.
216	BPStark-49	BPStark-1972-10-43	10-43	49	1972-01-11	14490	10-43 14490 Otter Creek. Hgy 270 May, Okla. Sandy substrate. No stoneflies.
217	BPStark-34	BPStark-1972-10-44	10-44	34	1972-01-11	14693	10-44 14693 Cimarron River. Farm Road 2 mi N Kenton at Black Mesa. No stoneflies.
218	BPStark-35	BPStark-1972-10-45	10-45	35	1972-01-11	14698	10-45 14698 Unnamed. 4 mi E Kenton. Rocky substrate, no stoneflies.
219	BPStark-170	BPStark-1972-10-46	10-46	170	1972-01-11	14884	10-46 14884 Prairie Dog Fork. Palo Duro Canyon, Tex. Many [Meso]capnia [frisoni] under rocks. Fish.
220							Spent night in Plainview, Texas.
221							1-12-72
222	BPStark-64	BPStark-1972-10-47	10-47	64	1972-01-12	15262	10-47 15262 Unnamed. Hgy 70 1 mi N Mannsville. No stoneflies.
223	BPStark-98	BPStark-1972-10-48	10-48	98	1972-01-12	15248	10-48 15248 L. Glasses Cr. Hwy 70 2 mi NW Kingston. Limestone substrate. Zealeuctra many naiads & a few adults.
224							1-29-72
225							Irving B.M. 16691. Total 234.
226	BPStark-19	BPStark-1972-11-1	11-1	19	1972-01-29	16820	11-1 16820 Unnamed stream. 11 mi S Durant, Okla. Hwy 69. No stoneflies.
227	BPStark-169	BPStark-1972-11-2	11-2	169	1972-01-29	16835	11-2 16835 Unnamed stream. 4 mi S Sherman, Tex. Hgy 69. No stoneflies
228							1-31-72
229							B.M. 16971 (Denton). E.M. 17370. [total] 399.
230	BPStark-94	BPStark-1972-12-1	12-1	94	1972-01-31	17035	12-1 17035 Boggy Creek. Hgy 32 9 mi E Marietta. No stoneflies. Love Co.
231	BPStark-97	BPStark-1972-12-2	12-2	97	1972-01-31	17042	12-2 17042 House Creek. Hgy 32 9 mi W Kingston. No stoneflies. Marshall Co.
232	BPStark-96	BPStark-1972-12-3	12-3	96	1972-01-31	17045	12-3 17045 Briar Creek. Hgy 32 7 mi W Kingston. No stoneflies.
233	BPStark-17	BPStark-1972-12-4	12-4	17	1972-01-31	17077	12-4 17077 Blue River. Hgy 69 5 mi N Durant. Strophopteryx, Taeniopteryx & Allocapnia adults and naiads.
234	BPStark-18	BPStark-1972-12-5	12-5	18	1972-01-31	17101	12-5 17101 Sulphur Creek. Hgy 70 4 mi E Bokchito. Allocapnia adults.
235	BPStark-31	BPStark-1972-12-6	12-6	31	1972-01-31	17150	12-6 17150 Unnamed. Hgy 70 Ft. Towson. No stoneflies.
236	BPStark-105	BPStark-1972-12-7	12-7	105	1972-01-31	17158	12-7 17158 Clear Creek. Hgy 70 7 mi E Ft. Towson. Taenioptenyx adult & naiads. McCurtain.
237	BPStark-171	BPStark-1972-12-8	12-8	171	1972-01-31	17199	12-8 17199 Gouchy Creek. Hgy 37 10 mi S Clarksville. Isoperla naiads.
238							Feb. 10, 1972
239							Rhame - Stark. Roys Truck. B.M. 60861.
240	BPStark-165	BPStark-1972-13-1	13-1	165	1972-02-10	60891	13-1 60891 Trinity River at Calif. St. Gainesville, Tex. Many Hydroperla naiads. Rearing cup #22.
241	BPStark-166	BPStark-1972-13-2	13-2	166	1972-02-10	60895	13-2 60895 Wheeler Creek. FM 678 Gainesville, Tex. No stoneflies.
242	BPStark-95	BPStark-1972-13-3	13-3	95	1972-02-10	60930	13-3 60930 unnamed stream. Stewart-Redden Farm, 3 mi E Thackerville. No stoneflies. Plains. Topminnows collected. Love County.
243	BPStark-164	BPStark-1972-13-4	13-4	164	1972-02-10	.	13-4 Unnamed stream at Roadside Park I-35, 1/4 mile S of Red River. Cooke Co., Texas. Zealeuctra naiads.
244							Feb. 12, 1972
245							B.M. 18080. E.M. 18991. [total] 911
246	BPStark-81	BPStark-1972-14-1	14-1	81	1972-02-12	18321	14-1 18321 Long Creek. 9 mi S Red Oak. Allocapnia & Zealeuctra adults.
247	BPStark-146	BPStark-1972-14-2	14-2	146	1972-02-12	18363	14-2 18363 Hardy Creek. 2 9 mi S Clayton Hwy 271. Zealeuctra adults & a few misc. naiads.
248	BPStark-69	BPStark-1972-14-3	14-3	69	1972-02-12	18405	14-3 18405 Fourche Maline. 3 5 mi E Wilburton Hwy 270. 1 Allocapnia Female.
249	BPStark-84	BPStark-1972-14-4	14-4	84	1972-02-12	18418	14-4 18418 Red Oak Creek. Farm Road 6 mi SE Red Oak. Several Allocapnia adults.
250							Feb. 13, 1972
251	BPStark-50	BPStark-1972-14-5	14-5	50	1972-02-13	18475	14-5 18475 Unnamed. 6 mi N Kinta Hwy 2. Strophopteryx & Zealeuctra adults.
252	BPStark-123	BPStark-1972-14-6	14-6	123	1972-02-13	18490	14-6 18490 Unnamed 3 mi N Porum Hwy 2. Allocapnia & Zealeuctra.
253	BPStark-157	BPStark-1972-14-7	14-7	157	1972-02-13	18516	14-7 18516 Unnamed. 2 mi W Vian Hwy 64. Zealeuctra naiads.
254	BPStark-159	BPStark-1972-14-8	14-8	159	1972-02-13	18517	14-8 18517 Unnamed. 1 mi W Vian Hwy 64. Naiads Hydroperla.
255	BPStark-155	BPStark-1972-14-9	14-9	155	1972-02-13	18532	14-9 18532 Unnamed. 1 mi E Sallisaw Hwy 64. Several Allocapnia adults. Sequoyah Co.
256	BPStark-11	BPStark-1972-14-10	14-10	11	1972-02-13	18553	14-10 18553 Unnamed. 10 mi S Stillwell Hwy 59 (Marked as 14-9). Zealeuctra & Allocapnia. Adair Co.
257	BPStark-5	BPStark-1972-14-11	14-11	5	1972-02-13	18584	14-11 18584 Ballard Creek. 7 mi N Westville Hwy 59. Allocapnia & Strophopteryx.
258	BPStark-43	BPStark-1972-14-12	14-12	43	1972-02-13	18599	14-12 18599 Flint Creek. Flint, OKla. Hwy 33. 1 Strophopteryx naiad only winter form.. Delaware Co.
259	BPStark-44	BPStark-1972-14-13	14-13	44	1972-02-13	18605	14-13 18605 Unnamed. 1 mi W Kansas, Okla. Many Allocapnia [& 1] Zealeuctra. Delaware Co.
260	BPStark-102	BPStark-1972-14-14	14-14	102	1972-02-13	18620	14-14 18620 Unnamed. 1 mi W Rose. Allocapnia & Zealeuctra (Fish). Mayes Co.
261	BPStark-122	BPStark-1972-14-15	14-15	122	1972-02-13	18675	14-15 18675 Unnamed. 3 mi S Muskogee Hwy 64. No stoneflies. Muskogee Co.
262	BPStark-51	BPStark-1972-14-16	14-16	51	1972-02-13	18709	14-16 18709 Unnamed. 2 mi East Whitefield Hwy 9. Allocapnia & Zealeuctra. Marked 14-15.
263							2-19-72
264							B.M. 19357. E.M. 20258. 9 d?
265	BPStark-107	BPStark-1972-15-1	15-1	107	1972-02-19		15-1 Cypress Creek Hwy 98 N Valliant, Okla. Few Allocapnia.
266	BPStark-104	BPStark-1972-15-2	15-2	104	1972-02-19		15-2 Unnamed. Hwy 259 19 mi N Broken. 1 Zealeuctra, female Allocapnia from 15-1.
267	BPStark-113	BPStark-1972-15-3	15-3	113	1972-02-19	19608	15-3 19608 Mt Fork. Hwy 259 32 mi N Broken Bow. Taeniopteryx & Allocapnia, fish.
268	BPStark-82	BPStark-1972-15-4	15-4	82	1972-02-19	19639	15-4 19639 Pigeon Creek. Hwy 63 6 mi E Big Cedar. Hydroperla naiads.
269	BPStark-78	BPStark-1972-15-5	15-5	78	1972-02-19	19641	15-5 19641 Unnamed.4 mi E Big Cedar. Perlesta & Hydroperla naiads.
270	BPStark-83	BPStark-1972-15-6	15-6	83	1972-02-19	19686	15-6 19686 Polk Creek. Hgy 59 1 mi N Poteau. Zealeuctra, Allocapnia, Strophopteryx naiads.
271	BPStark-88	BPStark-1972-15-7	15-7	88	1972-02-19	19695	15-7 19695 unnamed. Farm Road 5 mi W Shady Point. No stoneflies.
272	BPStark-76	BPStark-1972-15-8	15-8	76	1972-02-19	19729	15-8 19729 Turkey Creek. Hgy 270 6 mi E Red Oak. Allocapnia female, Strophopteryx & Zealeuctra naiads.
273							2-20-1972
274	BPStark-50	BPStark-1972-15-9	15-9	50	1972-02-20	19781	15-9 19781 Unnamed. 7 mi N Kinta Hwy 2. Zealeuctra & Allocapnia.
275	BPStark-157	BPStark-1972-15-10	15-10	157	1972-02-20	19821	15-10 19821 Unnamed. 2 mi W Vian Hwy 64. Zealeuctra 2 adults, several naiads. The stream had dried up for a distance of ~15 feet leaving small pools of ~1 ft diameter. The naiads were in these pools. The stream came back above ground ~15' downstream.
276	BPStark-11	BPStark-1972-15-11	15-11	11	1972-02-20	19854	15-10 19854 Unnamed. 9 mi S Stillwell Hwy 59. Zealeuctra & Allocapnia adults.
277	BPStark-9	BPStark-1972-15-12	15-12	9	1972-02-20	19872	15-12 19872 Unnamed. 1/2 mi N Baron Hwy 59. Numerous Allocapnia, Nemourids, Strophopteryx, Zealeuctra.
278	BPStark-5	BPStark-1972-15-13	15-13	5	1972-02-20	19884	15-13 19884 Ballard Creek. 6 mi N Westville Hwy 59. Strophopteryx & Allocapnia.
279	BPStark-44	BPStark-1972-15-14	15-14	44	1972-02-20	19907	15-14 19907 Unnamed. 1 1 mi W Kansas, Okla. Hwy 33. Allocapnia.
280	BPStark-24	BPStark-1972-15-15	15-15	24	1972-02-20	19915	15-15 19915 Unnamed. 7 mi S Kansas Hwy 10. Cherokee Co. Naiads, fish.
281	BPStark-125	BPStark-1972-15-16	15-16	125	1972-02-20	19952	15-16 19952 Unnamed. 13 mi SW Tahlequah Hwy 10-62. Naiads.
282	BPStark-124	BPStark-1972-15-17	15-17	124	1972-02-20	19982	15-17 19982. Unnamed. 9 mi S Braggs Hwy 10. Allocapnia, Strophopteryx.
283	BPStark-52	BPStark-1972-15-18	15-18	52	1972-02-20	20027	15-18 20027 Unnamed. 2 mi S Kinta Hwy 2. Hydroperla naiads.
284							Mar. 8, 1972
285							E.M. 21801. B.M. 21291
286	BPStark-15	BPStark-1972-16-1	16-1	15	1972-03-08	21442	16-1 21442 Limestone Creek. Hgy 75 at Limestone Gap. Zealeuctra adults & Perlinella, Isoperla, Hydroperla.
287	BPStark-134	BPStark-1972-16-2	16-2	134	1972-03-08	21455	16-2 21455 Unnamed. Hgy 63 1 mi E Pittsburg. No stoneflies.
288	BPStark-83	BPStark-1972-16-3	16-3	83	1972-03-08	21538	16-3 21538 Polk Creek. Hgy 59 1 mi N Poteau. Numerous Strophopteryx adults, a few Zealeuctra. Photos of stream, adults, exuviae.
289	BPStark-80	BPStark-1972-16-4	16-4	80	1972-03-08	21369	16-4 21369 Long Creek. Farm Road 1 mi W LeFlore. Hydroperla & Allocapnia.
290							Mar. 18, 1972
291							B.M. 22400. E.M. 23162.
292	BPStark-11	BPStark-1972-17-1	17-1	11	1972-03-18	22713	17-1 22713 Yellow Spring Creek. Hgy 2 10 mi S Stillwell. Naiads only.. Adair.
293	BPStark-9	BPStark-1972-17-2	17-2	9	1972-03-18	11731	17-2 11731 Unnamed stream. .5 mi N Baron Hwy 59. Few Perlinella, Zealeuctra & Allocapnia adults. Naiads in small bucket and fish.
294	BPStark-5	BPStark-1972-17-3	17-3	5	1972-03-18	22743	17-3 22743 Ballard Crk. 7 mi N Westville Hwy 59. 2 adults. Several Acroneuria naiads in white bucket with green top.
295	BPStark-43	BPStark-1972-17-4	17-4	43	1972-03-18	22758	17-4 22758 Flint Creek. Flint, Okla. Hwy 33. 1 Isogenus adult, 1 Zealeuctra. Naiads in large bucket.
296	BPStark-25	BPStark-1972-17-5	17-5	25	1972-03-18	22801	17-5 22801 14-mile Creek. 6 mi S Peggs Hwy 82. Naiads only.
297	BPStark-26	BPStark-1972-17-6	17-6	26	1972-03-18	22814	17-6 22814 Illinois River. 2 mi E Tahlequah Hwy 51. 1 Isogenus adult, naiads, fish.
298	BPStark-83	BPStark-1972-17-7	17-7	83	1972-03-18	22898	17-7 22898 Polk Creek. 1 mi N Poteau Hwy 59. Naiads + 2 adults.
299							Mar. 19, 1972
300	BPStark-84	BPStark-1972-17-8	17-8	84	1972-03-19		17-8 Red Oak Creek. Farm Road 5 mi SE Red Oak. Several Isoperla adults.

## Sheet: Unique Locations
Stark Locations	Country	State	County	Locality	Body of water	Other descriptor	Latitude	Longitude	Precision code	GBIF Precision	StreamWidthCode
BPStark-1	U.S.A.	Arizona	Coconino	near Sedona - Todd's Lodge	Oak Creek	Oak Creek Canyon	34.8753	-111.754	2	1000	3
BPStark-2	U.S.A.	Arizona	Pima	Sabino Canyon	Sabino Creek		32.3222	-110.81	2	1000	3
BPStark-3	U.S.A.	New Mexico	Guadalupe	Santa Rosa	Pecos River		34.9396	-104.691	2	1000	4
BPStark-4	U.S.A.	New Mexico	McKinley		Second Creek?
BPStark-11	U.S.A.	Oklahoma	Adair	10 mi S Stillwell at Hwy 59	Yellow Spring Creek		35.6867	-94.6722	2	1000	2
BPStark-10	U.S.A.	Oklahoma	Adair	21 mi N Sallisaw at Hwy 59	Tributary Hanging Creek		35.743	-94.6426	2	1000
BPStark-5	U.S.A.	Oklahoma	Adair	6 mi N Westville at Hwy 59	Ballard Creek		36.0865	-94.5873	1	10	4
BPStark-7	U.S.A.	Oklahoma	Adair	8 mi N Stillwell at Hwy 59	Baron Fork		35.9192	-94.6197	1	10	4
BPStark-9	U.S.A.	Oklahoma	Adair	8 mi N Stillwell at Hwy 59	Shell Branch		35.9237	-94.616	1	10	3
BPStark-8	U.S.A.	Oklahoma	Adair	8 mi W Westville at Hwy 62	Peacheater Creek		35.9551	-94.6964	2	1000	3
BPStark-6	U.S.A.	Oklahoma	Adair	Watts at Hwy 59	Ballard Creek		36.1086	-94.5649	2	1000	3
BPStark-13	U.S.A.	Oklahoma	Atoka	12 mi W Antlers at Hwy 37	Cold Springs Creek		34.2592	-95.8329	1	10	2
BPStark-14	U.S.A.	Oklahoma	Atoka	7 mi W Farris at Hwy 3	Double Spring Creek		34.2911	-95.9723	1	10	3
BPStark-12	U.S.A.	Oklahoma	Atoka	8 mi N Caddo at Hwy 75	Caney Creek		34.2428	-96.2186	1	10	3
BPStark-15	U.S.A.	Oklahoma	Atoka	Limestone Gap at US-69	Limestone Creek		34.6017	-95.9755	2	1000	3
BPStark-16	U.S.A.	Oklahoma	Blaine	7 mi N Watonga	Bitter Creek	Roman Nose State Park	35.9334	-98.4409	2	1000	2
BPStark-19	U.S.A.	Oklahoma	Bryan	11 mi S Durant at Hwy 69	Tributary Little Sand Creek		33.8736	-96.5076	2	1000	2
BPStark-18	U.S.A.	Oklahoma	Bryan	4 mi E Bokchito at Hwy 70	Sulphur Creek		34.0007	-96.067	1	10	3
BPStark-17	U.S.A.	Oklahoma	Bryan	5 mi N Durant below dam	Blue River		34.0624	-96.3433	1	10	4
BPStark-20	U.S.A.	Oklahoma	Bryan	8 mi W. Boswell at Hwy 70	Winters Creek		34.0266	-96.0027	1	10	3
BPStark-21	U.S.A.	Oklahoma	Caddo	25 mi E Cordell at Hwy 152	Lake Creek		35.2908	-98.5298	2	1000	3
BPStark-22	U.S.A.	Oklahoma	Caddo		Tributary Sugar Creek	Red Rock Canyon State Park	35.4456	-98.3539	2	1000	2
BPStark-23	U.S.A.	Oklahoma	Carter	6 mi W I-35 interchange at Hwy 53	Tributary Salt Creek		34.3326	-97.2645	2	1000	2
BPStark-26	U.S.A.	Oklahoma	Cherokee	2 mi E Tahlequah at Hwy 51	Illinois River		35.9261	-94.9233	2	1000	5
BPStark-25	U.S.A.	Oklahoma	Cherokee	6 mi S Peggs at Hwy 82	Fourteenmile Creek		36.0114	-95.0345	2	1000	4
BPStark-24	U.S.A.	Oklahoma	Cherokee	7 mi S Kansas at Hwy 10	Falls Branch		36.1086	-94.8261	1	10	2
BPStark-27	U.S.A.	Oklahoma	Cherokee	Hulbert at Hwy 51	Spring Creek		35.933	-95.1499	1	10	4
BPStark-28	U.S.A.	Oklahoma	Choctaw	10 mi W Hugo at Hwy 70	Bokchito Creek		34.0405	-95.6697	1	10	3
BPStark-32	U.S.A.	Oklahoma	Choctaw	4 mi E Hugo at Hwy 70	Tributary Kiamichi River		33.997	-95.4329	2	1000	2
BPStark-30	U.S.A.	Oklahoma	Choctaw	4 mi N Valliant at Hwy 98	Cypress Creek		34.0697	-95.0194	1	10	3
BPStark-33	U.S.A.	Oklahoma	Choctaw	5 mi. E Hugo at Hwy 70	Tributary Kiamichi River		33.9973	-95.4242	1	10	2
BPStark-29	U.S.A.	Oklahoma	Choctaw	6 mi E Ft. Towson at Hwy 70	Clear Creek		34.0144	-95.1557	1	10	3
BPStark-31	U.S.A.	Oklahoma	Choctaw	Ft. Towson at Hwy 70	Negro Creek		34.0157	-95.2681	2	1000	3
BPStark-34	U.S.A.	Oklahoma	Cimarron	2 mi N Kenton at Black Mesa at Farm road	Cimarron River		36.9264	-102.959	1	10	3
BPStark-35	U.S.A.	Oklahoma	Cimarron	4 mi E Kenton at [Hwy 325]	Tesequite Creek		36.8977	-102.899	1	10	3
BPStark-36	U.S.A.	Oklahoma	Coal	5 mi N Wapanucka at Hwy 48	Tributary Delaware Creek		34.4512	-96.4245	1	10	3
BPStark-37	U.S.A.	Oklahoma	Comanche	8 mi W Lawton at Hwy 62	Crater Creek		34.6386	-98.6212	2	1000	3
BPStark-38	U.S.A.	Oklahoma	Comanche	Cache at Hwy 62	West Cache Creek		34.639	-98.6469	1	10	3
BPStark-41	U.S.A.	Oklahoma	Craig	15 mi W Vinita at Hwy 60	Lightening Creek		36.6951	-95.3763	2	1000	3
BPStark-40	U.S.A.	Oklahoma	Craig	15 mi W Welch at Hwy 10	East Fork Big Creek		36.8876	-95.3833	1	10	3
BPStark-39	U.S.A.	Oklahoma	Craig	3 mi W Welch at Hwy 10	Deer Creek		36.8737	-95.1534	1	10	3
BPStark-42	U.S.A.	Oklahoma	Creek	5 mi S Jennings at Hwy 99	Lagoon Creek		36.126	-96.5751	1	10	3
BPStark-44	U.S.A.	Oklahoma	Delaware	1 mi W Kansas at [Alt. 412]	Spring Creek		36.2051	-94.8065	1	10	3
BPStark-43	U.S.A.	Oklahoma	Delaware	Flint at Hwy 59/33	Flint Creek		36.1868	-94.7069	2	1000	4
BPStark-48	U.S.A.	Oklahoma	Garvin	1 mi S Wynnewood at Farm road	Turkey Sandy Creek		34.6226	-97.1562	1	10	3
BPStark-46	U.S.A.	Oklahoma	Garvin	8 mi W Elmore City at Hwy 29	Salt Creek		34.6303	-97.5359	1	10	2
BPStark-45	U.S.A.	Oklahoma	Garvin	9 mi E Wynnewood at Hwy 29	Chigley Sandy Creek		34.6514	-97.0175	2	1000	3
BPStark-47	U.S.A.	Oklahoma	Garvin	Wynnewood at Farm road	Tributary Turkey Sandy Creek		34.6377	-97.1602	2	1000	2
BPStark-49	U.S.A.	Oklahoma	Harper	May at Hwy 270	Otter Creek		36.618	-99.7602	2	1000	2
BPStark-51	U.S.A.	Oklahoma	Haskell	1 mi E Whitefield at Hwy 9	Kings Creek		35.2536	-95.221	2	1000	3
BPStark-52	U.S.A.	Oklahoma	Haskell	2 mi S Kinta at Hwy 2	Sans Bois Creek		35.1114	-95.2006	1	10	3
BPStark-50	U.S.A.	Oklahoma	Haskell	4 mi S Whitefield at Hwy 2	Elm Creek		35.2011	-95.2404	1	10	3
BPStark-53	U.S.A.	Oklahoma	Haskell	9 mi W Keota at Hwy 9	Taloka Creek		35.2607	-95.0877	1	10	2
BPStark-57	U.S.A.	Oklahoma	Hughes	1 mi N Calvin at Hwy 270	South Canadian River		34.9756	-96.2428	2	1000	5
BPStark-56	U.S.A.	Oklahoma	Hughes	2 mi E Calvin at Hwy 270	Salt Creek		34.9532	-96.2062	1	10	3
BPStark-55	U.S.A.	Oklahoma	Hughes	3 mi W Calvin at Hwy 1	Dark Hollow Creek		34.9568	-96.3012	1	10	3
BPStark-54	U.S.A.	Oklahoma	Hughes	W Stuart at Hwy 270	Coal Creek		34.9003	-96.1182	2	1000	2
BPStark-62	U.S.A.	Oklahoma	Johnston	0.5 mi E Fillmore at Hwy 48A	Sandy Creek		34.2744	-96.4828	1	10	3
BPStark-59	U.S.A.	Oklahoma	Johnston	0.5 mi N Milburn at Hwy 48A	Blue River		34.2509	-96.5494	1	10	4
BPStark-64	U.S.A.	Oklahoma	Johnston	1 mi N Mannsville at [Grand Rd.]	Tributary Washita River		34.2092	-96.8809	2	1000	3
BPStark-60	U.S.A.	Oklahoma	Johnston	11 mi NE Tishomingo at Hwy 7	Blue River	Fish and Hunting Area	34.3612	-96.5901	2	1000	4
BPStark-58	U.S.A.	Oklahoma	Johnston	2 mi E Tishomingo at Hwy 78	Big Sandy Creek		34.2304	-96.6367	1	10	3
BPStark-63	U.S.A.	Oklahoma	Johnston	3 mi S Wapanucka at Hwy 48	Sandy Creek		34.3293	-96.4195	1	10	3
BPStark-65	U.S.A.	Oklahoma	Johnston	3 mi W Mannsville at Hwy 70	Tributary Wolf Creek		34.1872	-96.9334	1	10	2
BPStark-61	U.S.A.	Oklahoma	Johnston	Tishomingo at Hwy 22	Pennington Creek		34.2391	-96.6852	2	1000	4
BPStark-66	U.S.A.	Oklahoma	Kiowa	10 mi N Snyder at Hwy 183	Glen Creek		34.7974	-98.9734	2	1000	3
BPStark-71	U.S.A.	Oklahoma	Latimer	1 mi E Panola at Hwy 270	Little Fourche Maline Creek		34.934	-95.2056	1	10	4
BPStark-73	U.S.A.	Oklahoma	Latimer	1 mi W Wister at Hwy 270	Mountain Creek		34.9708	-94.7358	1	10	3
BPStark-75	U.S.A.	Oklahoma	Latimer	13 mi E Hartshorne at Hwy 1	Pine Creek		34.7954	-95.3455	1	10	3
BPStark-72	U.S.A.	Oklahoma	Latimer	2 mi N Bengal at county road	Long Creek		34.8512	-95.0665	2	1000	3
BPStark-67	U.S.A.	Oklahoma	Latimer	3 mi NE Red Oak at Farm road	Brazil Creek		34.99	-95.0238	2	1000	3
BPStark-69	U.S.A.	Oklahoma	Latimer	4 mi E Wilburton at Hwy 270	Fourche Maline Creek		34.9237	-95.253	1	10	3
BPStark-68	U.S.A.	Oklahoma	Latimer	5 mi E Fanshawe at Hwy 270	Caston Creek		34.9602	-94.8189	1	10	4
BPStark-76	U.S.A.	Oklahoma	Latimer	6 mi E Red Oak at Hwy 270	Turkey Creek		34.9492	-94.9904	1	10	3
BPStark-70	U.S.A.	Oklahoma	Latimer	7 mi N Wilburton at Hwy 2	Fourche Maline Creek	Robbers Cave State Park	34.9418	-95.3412	1	10	3
BPStark-74	U.S.A.	Oklahoma	Latimer	8 mi W Leflore at [Salonia Rd.]	Pigeon Creek		34.8984	-95.0517	2	1000	3
BPStark-83	U.S.A.	Oklahoma	LeFlore	1 mi N Poteau at Hwy 59	Polk Creek		35.0845	-94.63	1	10	2
BPStark-89	U.S.A.	Oklahoma	LeFlore	1 mi S Bengal at D4478 Rd.	Tributary Rock Creek		34.8202	-95.0604	1	10	2
BPStark-80	U.S.A.	Oklahoma	LeFlore	1 mi W LeFlore at CR-E1460	Long Creek		34.8986	-94.9945	1	10	4
BPStark-85	U.S.A.	Oklahoma	LeFlore	15 mi S Heavener at Hwy 59	Shawnee Creek		34.7494	-94.6279	1	10	3
BPStark-79	U.S.A.	Oklahoma	LeFlore	18 mi N. Smithville at Hwy 259	Kiamichi River		34.6373	-94.6538	1	10	4
BPStark-86	U.S.A.	Oklahoma	LeFlore	22 mi N Smithville at Hwy 259	Tributary Big Cedar Creek		34.687	-94.6463	1	10	2
BPStark-78	U.S.A.	Oklahoma	LeFlore	4 mi E Big Cedar at Hwy 63	Horse Bone Creek		34.6398	-94.5801	2	1000	3
BPStark-84	U.S.A.	Oklahoma	LeFlore	5 mi SE Red Oak at Farm road	Red Oak Creek		34.936	-94.9809	1	10	3
BPStark-88	U.S.A.	Oklahoma	LeFlore	5 mi W Shady Point at Farm road	Tributary Brazil Creek		35.1325	-94.7436	2	1000	2
BPStark-82	U.S.A.	Oklahoma	LeFlore	6 mi E Big Cedar at Hwy 63	Pigeon Creek		34.6454	-94.539	1	10	3
BPStark-77	U.S.A.	Oklahoma	LeFlore	8 mi N. Smithville at Hwy 259	Cucumber Creek		34.5664	-94.7074	1	10	3
BPStark-81	U.S.A.	Oklahoma	LeFlore	9 mi S Red Oak at [Hwy 82]	Long Creek		34.8513	-95.0663	1	10	4
BPStark-87	U.S.A.	Oklahoma	LeFlore	Page at Hwy 270	Tributary Big Creek		34.7097	-94.5492	2	1000	2
BPStark-91	U.S.A.	Oklahoma	Lincoln	12 mi S Stroud at Hwy 99	Deer Creek		35.5758	-96.6636	1	10	3
BPStark-90	U.S.A.	Oklahoma	Lincoln	4 mi S Stroud at Hwy 99	Deep Fork Canadian River		35.6861	-96.6625	2	1000	4
BPStark-92	U.S.A.	Oklahoma	Lincoln	6 mi S Dumright at Hwy 99	Tributary Sandy Creek		35.9364	-96.66	1	10	3
BPStark-93	U.S.A.	Oklahoma	Love	10 mi. W Marietta at Hwy 32	Walnut Bayou		33.9402	-97.306	2	1000	3
BPStark-94	U.S.A.	Oklahoma	Love	9 mi E Marietta at Hwy 32	Boggy Creek		33.9839	-96.9753	2	1000	3
BPStark-95	U.S.A.	Oklahoma	Love	Stewart-Redden Farm, 3 mi E Thackerville at	Hickory Creek		33.7956	-97.0989	2	1000	3
BPStark-98	U.S.A.	Oklahoma	Marshall	2 mi NW Kingston at Hwy 70	Little Glasses Creek		34.0314	-96.7284	2	1000	3
BPStark-99	U.S.A.	Oklahoma	Marshall	4 mi N Madill at Hwy 70	Tributary Washita River		34.1487	-96.8117	1	10	2
BPStark-96	U.S.A.	Oklahoma	Marshall	5 mi W Kingston at Hwy 32	Brier Creek		33.9983	-96.8282	1	10	3
BPStark-97	U.S.A.	Oklahoma	Marshall	9 mi W Kingston at Hwy 32	House Creek		33.9985	-96.8671	1	10	3
BPStark-102	U.S.A.	Oklahoma	Mayes	1 mi W Rose at Hwy 33	Tributary Little Spring Creek		36.2198	-95.0569	1	10	3
BPStark-101	U.S.A.	Oklahoma	Mayes	6 mi N Peggs at Hwy 82	Spring Creek		36.1484	-95.1586	1	10	4
BPStark-100	U.S.A.	Oklahoma	Mayes	7 mi N Peggs at Hwy 82	Snake Creek		36.1646	-95.1579	1	10	3
BPStark-116	U.S.A.	Oklahoma	McCurtain	1 mi W Smithville at Hwy 4	Tributary Big Eagle Creek		34.4671	-94.6522	1	10	3
BPStark-109	U.S.A.	Oklahoma	McCurtain	10 mi W Broken Bow at Hwy 3	Gibbs Creek		34.0942	-94.8932	1	10	2
BPStark-110	U.S.A.	Oklahoma	McCurtain	11 mi W Broken Bow at Hwy 3/7	Glover River		34.0978	-94.9026	2	1000	5
BPStark-111	U.S.A.	Oklahoma	McCurtain	15 mi W Broken Bow at Hwy 3/7	Horsehead Creek		34.1138	-94.9623	1	10	3
BPStark-104	U.S.A.	Oklahoma	McCurtain	19 mi N. Broken Bow at Hwy 259	Canyon Creek		34.308	-94.8176	2	1000	3
BPStark-106	U.S.A.	Oklahoma	McCurtain	2 mi E Broken Bow at Hwy 70	Coon Creek		34.0381	-94.6993	1	10	3
BPStark-117	U.S.A.	Oklahoma	McCurtain	2 mi N Broken Bow at Hwy 259	Yanubbee Creek		34.0604	-94.7392	1	10	3
BPStark-112	U.S.A.	Oklahoma	McCurtain	2 mi W Broken Bow at Hwy 3	Lakfata Creek		34.053	-94.8031	1	10	4
BPStark-114	U.S.A.	Oklahoma	McCurtain	30 mi N Broken Bow at Hwy 259	Ramos Creek		34.4123	-94.6816	3	10000	2
BPStark-113	U.S.A.	Oklahoma	McCurtain	32 mi N Broken Bow at Hwy 259	Mountain Fork		34.4041	-94.6854	2	1000	4
BPStark-115	U.S.A.	Oklahoma	McCurtain	5 mi N Valliant at Hwy 98	Rock Creek		34.0798	-95.0114	1	10	4
BPStark-105	U.S.A.	Oklahoma	McCurtain	6 mi E Ft. Towson at Hwy 70	Clear Creek		34.0143	-95.1557	1	10	3
BPStark-107	U.S.A.	Oklahoma	McCurtain	7 mi N Valiant at Hwy 98	Cypress Creek		34.0696	-95.0195	2	1000	3
BPStark-108	U.S.A.	Oklahoma	McCurtain	8 mi W Idabel at Hwy 37	Garvin Creek		33.8957	-94.954	1	10	3
BPStark-103	U.S.A.	Oklahoma	McCurtain		Buzzard Creek		33.9112	-95.0363	4	100000	3
BPStark-119	U.S.A.	Oklahoma	Murray	3 mi S Wynnewood at Farm road	Kickapoo Sandy Creek		34.6156	-97.1425	2	1000	3
BPStark-118	U.S.A.	Oklahoma	Murray	5 mi S Davis at Hwy 77	Honey Creek		34.4376	-97.1375	1	10	3
BPStark-121	U.S.A.	Oklahoma	Murray	6 mi N Dougherty at Hwy 110	Tributary Washita River		34.4699	-97.0907	2	1000	2
BPStark-120	U.S.A.	Oklahoma	Murray	Sulphur	Rock Creek	Platte National Park	34.5039	-96.9714	1	10	3
BPStark-125	U.S.A.	Oklahoma	Muskogee	13 mi SW Tahlequah at Hwy 10-62	Tributary Bayou Manard		35.7984	-95.1548	1	10	2
BPStark-123	U.S.A.	Oklahoma	Muskogee	3 mi N Porum at Hwy 2	South Fork Dirty Creek		35.3974	-95.2744	1	10	3
BPStark-122	U.S.A.	Oklahoma	Muskogee	3 mi S Muskogee at Hwy 64	Sam Creek		35.6885	-95.376	2	1000	3
BPStark-124	U.S.A.	Oklahoma	Muskogee	9 mi S Braggs at Hwy 10	Taylor Creek		35.5518	-95.1334	1	10	3
BPStark-126	U.S.A.	Oklahoma	Nowata	11 mi W Nowata at Hwy 60	Hog Shooter Creek		36.728	-95.8221	1	10	3
BPStark-127	U.S.A.	Oklahoma	Nowata	3 mi N Lenapah at Hwy 169	Tributary Hickory Creek		36.9001	-95.6295	2	1000	2
BPStark-129	U.S.A.	Oklahoma	Osage	6 mi S Pawhuska at Hwy 99	Birch Creek		36.5746	-96.3112	1	10	3
BPStark-128	U.S.A.	Oklahoma	Osage	6 mi S Wynona at Hwy 99	Big Hominy Creek		36.4737	-96.3784	1	10	3
BPStark-130	U.S.A.	Oklahoma	Ottawa	10 mi W Grove at Hwy 59	Little Horse Creek		36.685	-94.9136	1	10	3
BPStark-131	U.S.A.	Oklahoma	Ottawa	3 mi E Fairland at Hwy 60	Tributary Ogeechee Creek		36.7727	-94.8079	2	1000	2
BPStark-132	U.S.A.	Oklahoma	Payne	1 mi S Perkins at Hwy 177	Cimarron River		35.9595	-97.0323	2	1000	5
BPStark-134	U.S.A.	Oklahoma	Pittsburg	1 mi E Pittsburg at Hwy 63	Chun Creek		34.725	-95.8441	2	1000	3
BPStark-133	U.S.A.	Oklahoma	Pittsburg	1 mi W Haileyville at Hwy 270	Brushy Creek		34.8603	-95.5961	1	10	4
BPStark-135	U.S.A.	Oklahoma	Pittsburg	15 mi S MacAlester at Indian National Turnpike	unnamed stream		34.6917	-95.7555	2	1000	2
BPStark-136	U.S.A.	Oklahoma	Pontotoc	15 mi. SW Ada at Hwy 1	Blue River		34.6392	-96.8112	1	10	4
BPStark-138	U.S.A.	Oklahoma	Pontotoc	2 mi S Ahloso at Hwy 99	Clear Boggy Creek		34.7034	-96.635	1	10	3
BPStark-137	U.S.A.	Oklahoma	Pontotoc	5 mi S Ahloso at Hwy 99	Bois d'Arc Creek		34.6596	-96.6348	1	10	3
BPStark-139	U.S.A.	Oklahoma	Pontotoc	6 mi W Allen at Hwy 1	Muddy Boggy Creek		34.8301	-96.4856	1	10	3
BPStark-140	U.S.A.	Oklahoma	Pontotoc	8 mi N. Lula at Hwy 48	Muddy Boggy Creek		34.8071	-96.4229	1	10	3
BPStark-141	U.S.A.	Oklahoma	Pontotoc	Ada at Hwy 99	unnamed stream		34.7865	-96.695	2	1000
BPStark-142	U.S.A.	Oklahoma	Pottawatomie	6 mi S Prague at Hwy 99	North Canadian River		35.4008	-96.6705	1	10	4
BPStark-151	U.S.A.	Oklahoma	Pushmataha	1 mi S Albion at Hwy 271	Walnut Creek		34.6525	-95.1168	1	10	3
BPStark-144	U.S.A.	Oklahoma	Pushmataha	1 mi S Nashoba at Hwy 271	Buzzard Creek		34.4713	-95.2933	1	10	3
BPStark-145	U.S.A.	Oklahoma	Pushmataha	2 mi NE Albion at Hwy 271	Clear Creek		34.6729	-95.0696	1	10	3
BPStark-147	U.S.A.	Oklahoma	Pushmataha	2 mi S Clayton at Hwy 271	Hurd Creek		34.5623	-95.326	1	10	3
BPStark-143	U.S.A.	Oklahoma	Pushmataha	2 mi S Nashoba at Hwy 271	Big Cedar Creek		34.4608	-95.3224	1	10	3
BPStark-150	U.S.A.	Oklahoma	Pushmataha	4 mi N Antlers at Indian National Turnpike	Tributary Panther Creek		34.2683	-95.6709	2	1000	2
BPStark-148	U.S.A.	Oklahoma	Pushmataha	5 mi S Finley at Hwy 271	Little Cedar Creek		34.2877	-95.5781	1	10	3
BPStark-146	U.S.A.	Oklahoma	Pushmataha	7 mi S Clayton at Hwy 271	Hardy Creek		34.5057	-95.2833	1	10	3
BPStark-149	U.S.A.	Oklahoma	Pushmataha	9 mi S Nashoba at Hwy 271	Snow Creek		34.3949	-95.4141	1	10	3
BPStark-152	U.S.A.	Oklahoma	Seminole	3 mi E Wewoka at Hwy 270	Jacobs Creek		35.1067	-96.4473	1	10	3
BPStark-153	U.S.A.	Oklahoma	Seminole	3 mi S Bowlegs at Hwy 99	Little River		35.1061	-96.6683	1	10	4
BPStark-154	U.S.A.	Oklahoma	Seminole	9 mi S Prague at Hwy 99	Turkey Creek		35.3602	-96.6716	1	10	3
BPStark-155	U.S.A.	Oklahoma	Sequoyah	1 mi E Sallisaw at Hwy 64	Sallisaw Creek		35.4493	-94.7561	2	1000	4
BPStark-159	U.S.A.	Oklahoma	Sequoyah	1 mi W Vian at Hwy 64	Vian Creek		35.5004	-94.9847	1	10	3
BPStark-157	U.S.A.	Oklahoma	Sequoyah	2 mi W Vian at Hwy 64	Tributary Negro Creek		35.5001	-95.0134	1	10	2
BPStark-156	U.S.A.	Oklahoma	Sequoyah	4 mi W Gans at Hwy 141	Tributary Little Skin Creek		35.3764	-94.7569	2	1000	2
BPStark-158	U.S.A.	Oklahoma	Sequoyah	Sallisaw at Hwy 64	Tributary Sallisaw Creek		35.4604	-94.7875	2	1000
BPStark-160	U.S.A.	Oklahoma	Stephens	17 mi W Elmore City at Hwy 29	Black Bear Creek		34.6378	-97.7093	2	1000	2
BPStark-161	U.S.A.	Oklahoma	Tulsa	19 mi N Okmulgee at Hwy 75	North Duck Creek		35.8767	-96.0155	1	10	3
BPStark-162	U.S.A.	Oklahoma	Washington	5 mi S Copan at Hwy 75	Post Oak Creek		36.8373	-95.936	2	1000	2
BPStark-163	U.S.A.	Oklahoma	Washita	9 mi E Cordell at Hwy 152	Washita River		35.2911	-98.8366	1	10	4
BPStark-165	U.S.A.	Texas	Cooke	Gainesville at California St.	Trinity River		33.6244	-97.1562	1	10	4
BPStark-166	U.S.A.	Texas	Cooke	Gainesville at FM 678	Wheeler Creek		33.6257	-97.1176	1	10	3
BPStark-164	U.S.A.	Texas	Cooke	Roadside rest of I-35 at I-35	Tributary Red River	Rest Area I-35	33.7255	-97.1622	2	1000	3
BPStark-167	U.S.A.	Texas	Denton	1 mi W Bolivar at FM-455	Clear Creek		33.3587	-97.2506	1	10	4
BPStark-168	U.S.A.	Texas	Franklin	3 mi N Hagansport at Hwy 37	Sulphur River		33.368	-95.2397	1	10	5
BPStark-169	U.S.A.	Texas	Grayson	3 mi S Sherman at Hwy 69			33.5808	-96.4099	2	1000
BPStark-170	U.S.A.	Texas	Randall		Prairie Dog Town Fork Red River	Palo Duro Canyon State Park	34.9373	-101.648	2	1000	3
BPStark-171	U.S.A.	Texas	Red River	10 mi S Clarksville at Hwy 37	Gouchy Creek		33.5308	-95.2029	2	1000	3

## Sheet: Glossary
Field Notebook column headers	Explanation
RecordID	Consecutive number beginning from of Stark 1971/1972 field notebook
Stark Locations	Link from Field Notebook to Unique Locations. Note these these are found in Field Notebook as often as Stark visited the same location.
FieldNo.	Formal field number assigned by DeWalt to site/date event of Stark.
TripNumID	Site/Date event number used by Stark. First number is the trip number and the second is the consecutive number for a stop on that trip.
Date (M/D/YYYY)	Date of event.
Mileage	Beginning mileage for each site/date event.
VerbatimAccount	Verbatim text for each entry into the field notebook. Most often these corresponded to a collecting event, sometimes just a date of beginning a trip, or general note.
Unique Locations Column Headers
Stark Locations	Link from Field Notebook to Unique Locations. Note these these are found in Field Notebook as often as Stark visited the same location.
Country	Country of collection locality.
State	State of collection locality.
County	Country of collection locality.
Locality	Locality usually consisting of placename, distance and direction.
Body of water	Flowing body of water where collections occurred.
Other descriptor	Usually this was a public land name where the event occurred.
Latitude	Latitude of the collection locality. Northern hemisphere.
Longitude	Longitude of collection locality. Western hemisphere. Using negative sign.
Precision code	INHS code describing precision of coordinates. Lower number means higher precision.
GBIF Precision	Translation of precision code to uncertainty in meters radius.
StreamWidthCode	INHS code for describing width of stream in meters: 1=spring, 2=1-2 m wide, 3=3-10 m wide, 4=11-30 m wide, 5=31-60 m wide, 6=>60 m wide, 7=large lake.
